# Supplementary material for: Sucrose Facilitates Rhizome Development of Perennial Rice (Oryza longistaminata)
Source: MDPI journal article supplement (doi:10.3390/ijms232113396), 2022-11-02
Supplement: s1 [file s1]

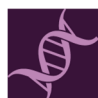

Article: Supplementary figures

# Sucrose Facilitates Rhizome Development of Perennial Rice (*Oryza longistaminata*)

Zhiquan Fan <sup>†</sup>, Guanwen Huang <sup>†</sup>, Yourong Fan <sup>\*</sup> and Jiangyi Yang <sup>\*</sup>

State Key Laboratory for Conservation and Utilization of Subtropical Agro-Bioresources,  
College of Life Science and Technology, Guangxi University, Nanning 530004, China

<sup>\*</sup> Correspondence: yrfan@gxu.edu.cn or fanyoured@163.com (Y.F.);

yangjy@gxu.edu.cn or yangjy598@163.com (J.Y.)

<sup>†</sup> These authors contributed equally to this work.

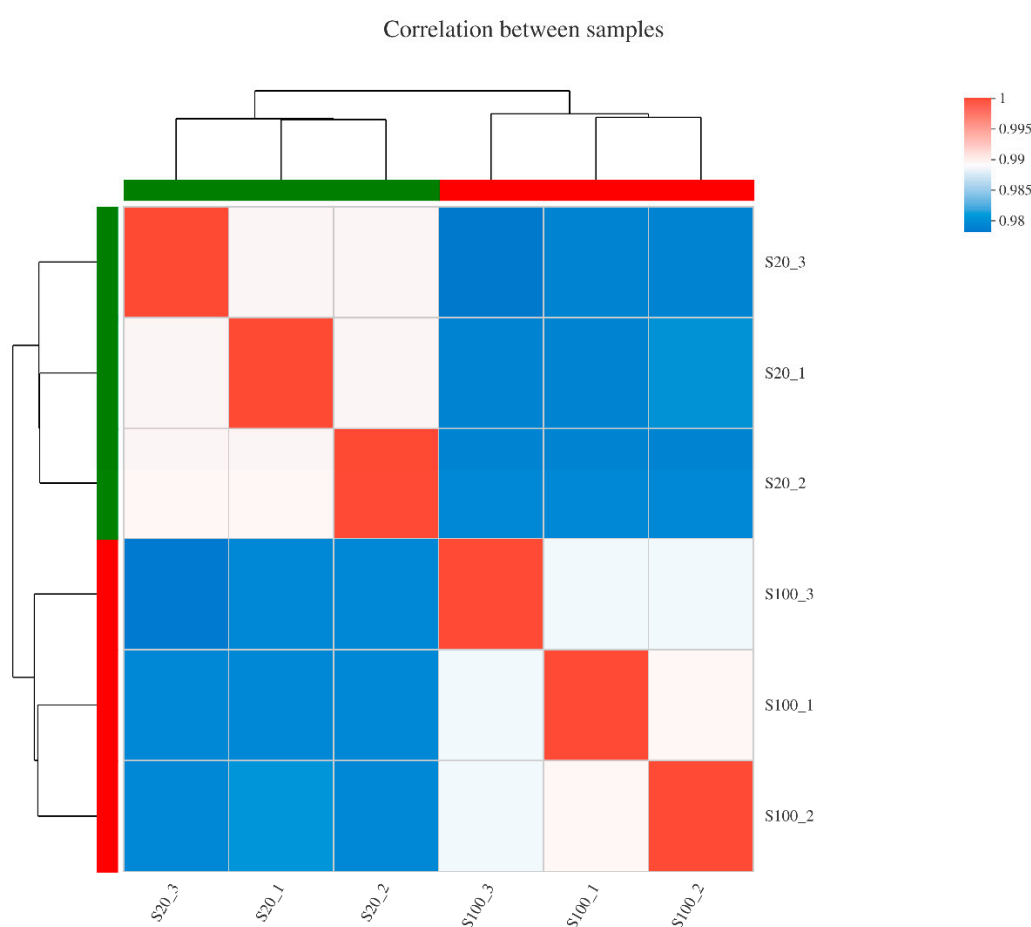

Figure S1. Cluster analysis of biological replication.

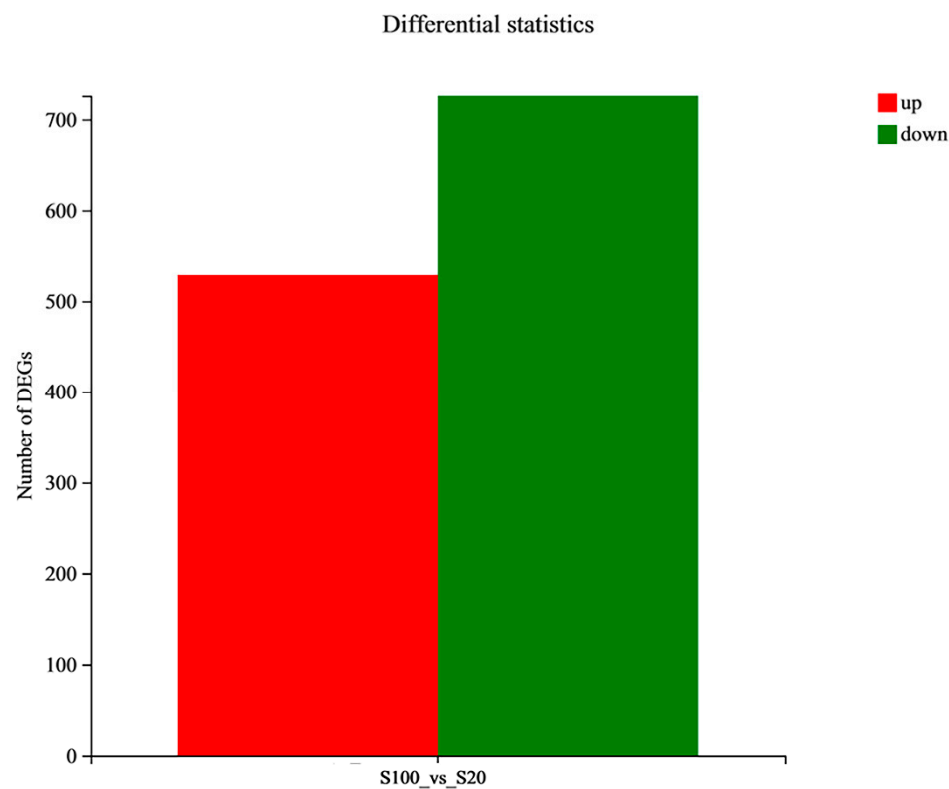

Figure S2. Statistics of differentially expressed genes.

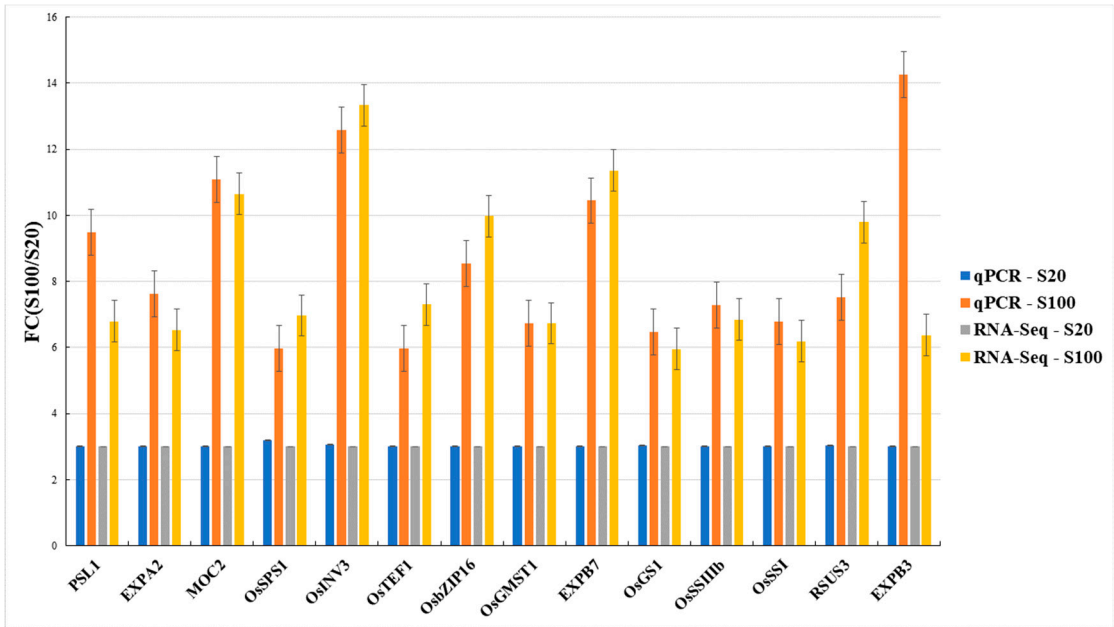

Figure S3. Quantitative real-time PCR validation.
